# Supplementary material for: From deficiency to toxicity: Magnesium increases cannabinoid and terpene production in cannabis plants
Source: Springer Nature journal article supplement (doi:10.1186/s42238-025-00358-9), 2025-12-10
Supplement: MOESM1 [file 42238_2025_358_MOESM1_ESM-1.pdf]

## Supplementary data

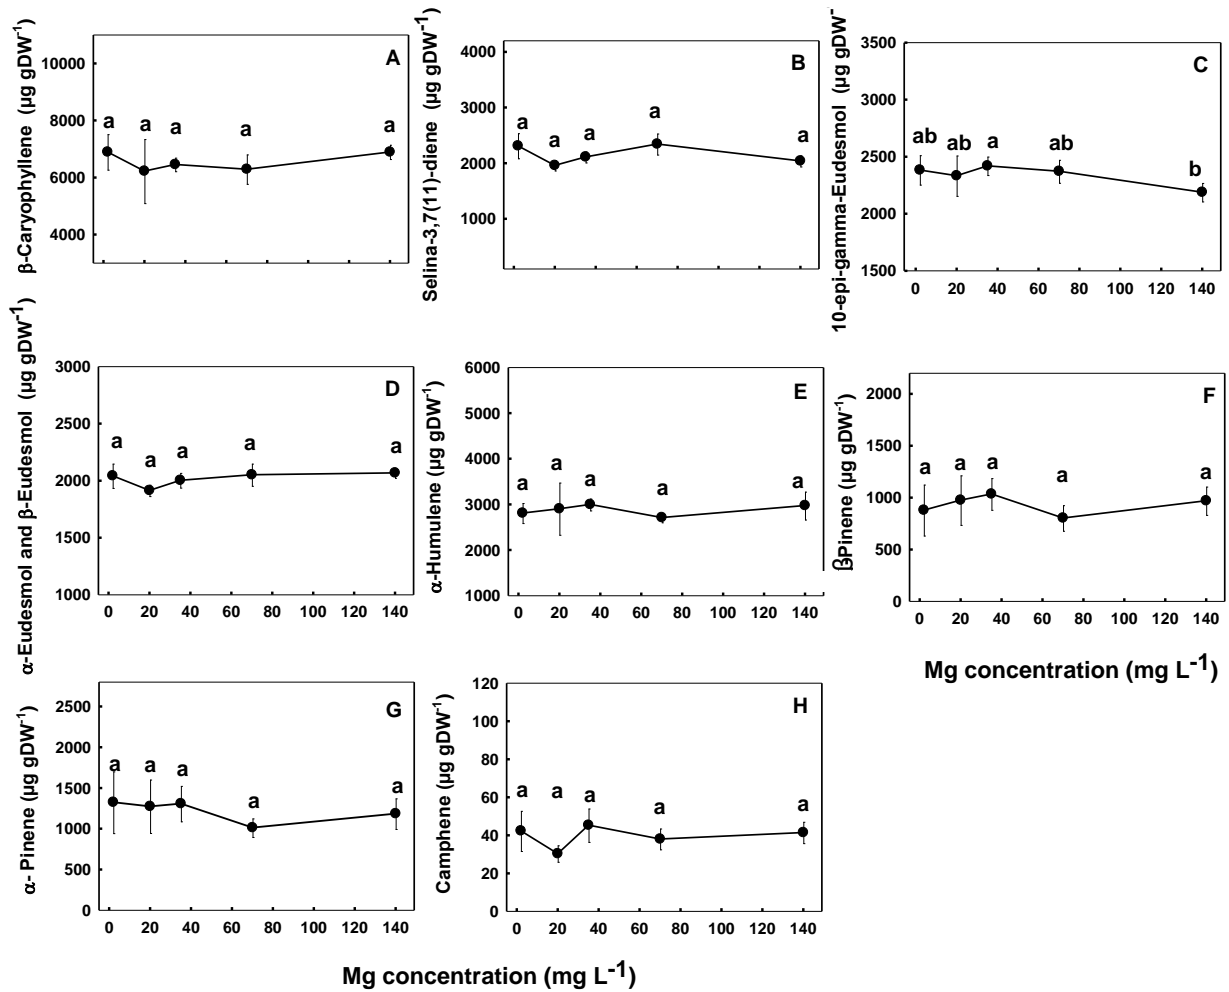

**Fig. S1 supplemental:** Effect of Mg supply on concentrations of additional terpenes at the apical inflorescence of medical cannabis plants.  $\beta$  caryophyllene (A), selina-3,7(11)-diene (B), 10-epi- $\gamma$ -eudesmol (C),  $\alpha$ -eudesmol and  $\beta$ -eudesmol (D),  $\alpha$ -humulene (E),  $\beta$ -pinene (F),  $\alpha$ -pinene (G), camphene (H). Data are means  $\pm$  SE (n = 5). Different letters above the means signify significant differences by Tukey HSD test at  $\alpha = 0.05$ .
